# Supplementary material
Source: publisher figshare collection journal article supplement (https://future-science-group.figshare.com/articles/dataset/_/22240444)
Supplement: Supplementary file 1 [file 1]

Table S2. Activity of active mafenide derivatives **1**-**4** against Gram-negative bacteria

| **Code** | **MIC [µM]** | | | | | | | | |
| --- | --- | --- | --- | --- | --- | --- | --- | --- | --- |
| EC | | KP | | ACI | | PA | | |
| 24 h | 48 h | 24 h | 48 h | 24 h | 24 h | 24 h | 48 h | |
| **2c** | 500 | 500 | 500 | 500 | >500 | >500 | >500 | >500 | |
| **2d** | 500 | 500 | 500 | 500 | 500 | 500 | >500 | >500 | |
| **2e** | 500 | 500 | 500 | 500 | 500 | 500 | >500 | >500 | |
| **2g** | 500 | 500 | 500 | 500 | >500 | >500 | >500 | >500 | |
| **2h** | 500 | 500 | 250 | 500 | >500 | >500 | >500 | >500 | |
| **2i** | **250** | **250** | **62.5** | **62.5** | 250 | 250 | **250** | **250** | |
| **2j** | 500 | 500 | 500 | 500 | >500 | >500 | >500 | >500 | |
| **2k** | 500 | 500 | 500 | 500 | >500 | >500 | >500 | >500 | |
| **3a** | **250** | **250** | 250 | 250 | 500 | 500 | >500 | >500 | |
| **3b** | **125** | **125** | 250 | 250 | **15.62** | **15.62** | **500** | **500** | |
| **4d** | **250** | 500 | 250 | 500 | 250 | 500 | >500 | >500 |
| **MFA 1** | >500 | >500 | >500 | >500 | >500 | >500 | >500 | >500 | |
| **PIP** | 7.41 | | >59.31 | | 59.31 | | 29.66 | | |

PIP = piperacillin sodium salt; MFA = mafenide acetate. EC: *Escherichia coli* ATCC 25922; KP: *Klebsiella pneumoniae* ATCC 10031; ACI: *Acinetobacter baumannii* ATCC 19606; PA: *Pseudomonas aeruginosa* ATCC 27853. The lowest MIC values for each strain are given in bold.
